# Supplementary material for: Effectiveness of SARS-CoV-2 primary vaccines and boosters in patients with type 2 diabetes mellitus in Hungary (HUN-VE 4 Study)
Source: PubMed Central journal article supplement — BMJ Open Diabetes Res Care. 2024 Jan 24;12(1):e003777. doi: 10.1136/bmjdrc-2023-003777 (PMC10823926; doi:10.1136/bmjdrc-2023-003777), 2024-01-24
Supplement: bmjdrc-2023-003777supp002.pdf [file bmjdrc-2023-003777supp002.pdf]

### Supplementary Figure Legend

**Supp. Figure 1** — The time course of the COVID-19 pandemic in Hungary with daily number of cases (grey bars) and the vaccine rollout data. The red fitted line shows the 7-day moving average. The different waves with the typical variant are also indicated.
