# Supplementary material for: Effectiveness of SARS-CoV-2 primary vaccines and boosters in patients with type 2 diabetes mellitus in Hungary (HUN-VE 4 Study)
Source: PubMed Central journal article supplement — BMJ Open Diabetes Res Care. 2024 Jan 24;12(1):e003777. doi: 10.1136/bmjdrc-2023-003777 (PMC10823926; doi:10.1136/bmjdrc-2023-003777), 2024-01-24
Supplement: bmjdrc-2023-003777supp003.pdf [file bmjdrc-2023-003777supp003.pdf]

**Supplementary Table 1 – Definition of history of chronic diseases included in the analysis** (reproduced with permission from the open access paper: Vokó et al. *Front. Immunol.* 13:919408. doi: 10.3389/fimmu.2022.919408)

| Disease                     | ICD codes*                                                                                                                                        | Other elements of the definition                                                                                                  |
|-----------------------------|---------------------------------------------------------------------------------------------------------------------------------------------------|-----------------------------------------------------------------------------------------------------------------------------------|
| Acute myocardial infarction | I2100, I2110, I2120, I2130, I2140, I2190, I2191, I2200, I2210, I2280, I2290, I2300, I2310, I2320, I2330, I2340, I2350, I2360, I2380, I2400, I2490 |                                                                                                                                   |
| Angina                      | I20                                                                                                                                               |                                                                                                                                   |
| Chronic heart failure       | I50, I42, I110, J81                                                                                                                               |                                                                                                                                   |
| Peripheral arterial disease | I70                                                                                                                                               |                                                                                                                                   |
| Stroke                      | I61, I6290, I63, I64, I74                                                                                                                         |                                                                                                                                   |
| Asthma bronchiale           | J40-44, J47                                                                                                                                       | the time lag between the first and second occurrences 30-365 days                                                                 |
| COPD                        | J45, 46                                                                                                                                           | the time lag between the first and second occurrences 30-365 days                                                                 |
| Diabetes mellitus           | a) E10-14 or<br>b) not required<br>and<br>polycystic ovary syndrome (E282) or<br>gestational diabetes (O24)                                       | at least 1 prescription of antidiabetic treatment (ATC A10)<br>at least 2 prescriptions of antidiabetic treatment (ATC A10)       |
| Type 1                      |                                                                                                                                                   | only insulin or maximum 3 oral antidiabetic prescriptions together with insulin prescriptions in the first half year of treatment |
| Type 2                      |                                                                                                                                                   | not Type 1 diabetes                                                                                                               |
| Chronic kidney disease      | N02, N03, N04, N05, N06, N07, N08, N11, N12, N14, N15, N16, N18, N19, N26, N27, N28, N29                                                          |                                                                                                                                   |
| Neoplasms                   | All ICD codes starting with C                                                                                                                     |                                                                                                                                   |
| Transplantation             | All patients from registry of transplantation                                                                                                     |                                                                                                                                   |
| Immunosuppression           | D5900, D5910, D6920, D8690, E05, E0630, G61, G70, I73, K50, K51, K52, K7430, K90,                                                                 |                                                                                                                                   |

L10, L40, L9590, M0690, M30, M31, M32,  
M33, M35, M36

---

COPD: chronic obstructive pulmonary disease; ICD: International Classification of Diseases; ATC: Anatomical Therapeutic Chemical

\* Two occurrences of ICD-10 codes in outpatient or inpatient claims data since 1 January 2013

(Copyright statement: Under the Frontiers Conditions for Website Use and the Frontiers General Conditions for Authors, authors of articles published in Frontiers journals retain copyright on their articles, except for any third-party images and other materials added by Frontiers, which are subject to copyright of their respective owners. Authors are therefore free to disseminate and re-publish their articles, subject to any requirements of third-party copyright owners and subject to the original publication being fully cited. The ability to copy, download, forward or otherwise distribute any materials is always subject to any copyright notices displayed. Copyright notices must be displayed prominently and may not be obliterated, deleted or hidden, totally or partially.

[https://www.frontiersin.org/journals/immunology/about?utm\\_source=ad&utm\\_medium=ggl-src&utm\\_campaign=sub\\_ggl\\_fimmu&gad=1&gclid=CjwKCAjw\\_uGmBhBREiwAeOfsd2eXRSAfgCpGVhKqDcbRgpCH\\_9NKmQ5DLrJd7zeN7\\_waKsrCuUQhdRoCJNoQAvD\\_BwE#about-open](https://www.frontiersin.org/journals/immunology/about?utm_source=ad&utm_medium=ggl-src&utm_campaign=sub_ggl_fimmu&gad=1&gclid=CjwKCAjw_uGmBhBREiwAeOfsd2eXRSAfgCpGVhKqDcbRgpCH_9NKmQ5DLrJd7zeN7_waKsrCuUQhdRoCJNoQAvD_BwE#about-open)

**Supplementary Table 2.** Incidence and adjusted effectiveness of vaccine combinations against *COVID-19* related death during the Delta wave in the 65-100 years old Hungarian healthy and T2DM population

| Vaccination                | Group   | Number of cases | Average population size (1000 persons) | Incidence rate (per 100 000 person-days) (95% CI) | Adjusted vaccine efficacy (%) (95% CI) | P-value comparing to unvaccinated | P-value for waning | P-value T2DM vs. Control |
|----------------------------|---------|-----------------|----------------------------------------|---------------------------------------------------|----------------------------------------|-----------------------------------|--------------------|--------------------------|
| Unvaccinated               | Control | 1 545           | 174.04                                 | 8.07 (7.67; 8.48)                                 | reference                              |                                   |                    |                          |
| Unvaccinated               | T2DM    | 962             | 40.44                                  | 21.63 (20.28; 23.04)                              | reference                              |                                   |                    |                          |
| <b>Pfizer-BionTech</b>     |         |                 |                                        |                                                   |                                        |                                   |                    |                          |
| primary 14-120 days        | Control | 30              | 21.87                                  | 1.25 (0.84; 1.78)                                 | 75.4 (64.6; 82.9)                      | <0.001                            | reference          | reference                |
| primary 14-120 days        | T2DM    | 25              | 10.00                                  | 2.27 (1.47; 3.35)                                 | 84.8 (77.3; 89.8)                      | <0.001                            | reference          | 0.08                     |
| primary 121-180 days       | Control | 66              | 77.39                                  | 0.78 (0.60; 0.99)                                 | 75.9 (68.9; 81.3)                      | <0.001                            | 0.93               | reference                |
| primary 121-180 days       | T2DM    | 66              | 41.29                                  | 1.45 (1.12; 1.85)                                 | 84.4 (79.8; 87.9)                      | <0.001                            | 0.91               | 0.02                     |
| primary 181-240 days       | Control | 153             | 66.34                                  | 2.10 (1.78; 2.46)                                 | 75.2 (70.6; 79.1)                      | <0.001                            | 0.97               | reference                |
| primary 181-240 days       | T2DM    | 262             | 37.45                                  | 6.36 (5.61; 7.18)                                 | 74.1 (70.3; 77.4)                      | <0.001                            | 0.013              | 0.71                     |
| Pfizer booster 14-120 days | Control | 42              | 92.50                                  | 0.41 (0.30; 0.56)                                 | 96.3 (94.9; 97.3)                      | <0.001                            | <0.001             | reference                |
| Pfizer booster 14-120 days | T2DM    | 94              | 61.47                                  | 1.39 (1.12; 1.70)                                 | 95.6 (94.5; 96.4)                      | <0.001                            | <0.001             | 0.38                     |
| <b>Moderna</b>             |         |                 |                                        |                                                   |                                        |                                   |                    |                          |
| primary 181-240 days       | Control | 17              | 10.61                                  | 1.46 (0.85; 2.33)                                 | 83.0 (72.5; 89.5)                      | <0.001                            |                    | reference                |
| primary 181-240 days       | T2DM    | 30              | 5.72                                   | 4.76 (3.21; 6.80)                                 | 80.2 (71.6; 86.3)                      | <0.001                            |                    | 0.63                     |
| <b>Sputnik</b>             |         |                 |                                        |                                                   |                                        |                                   |                    |                          |
| primary 181-240 days       | Control | 35              | 25.12                                  | 1.27 (0.88; 1.76)                                 | 80.6 (72.7; 86.2)                      | <0.001                            |                    | reference                |
| primary 181-240 days       | T2DM    | 28              | 6.45                                   | 3.95 (2.62; 5.70)                                 | 82.5 (74.5; 88.0)                      | <0.001                            |                    | 0.70                     |
| <b>Astra-Zeneca</b>        |         |                 |                                        |                                                   |                                        |                                   |                    |                          |
| primary 121-180 days       | Control | 40              | 25.91                                  | 1.40 (1.00; 1.91)                                 | 78.5 (70.4; 84.3)                      | <0.001                            |                    | reference                |
| primary 121-180 days       | T2DM    | 66              | 11.83                                  | 5.07 (3.92; 6.45)                                 | 74.2 (66.9; 80.0)                      | <0.001                            |                    | 0.38                     |
| primary 181-240 days       | Control | 22              | 4.72                                   | 4.24 (2.66; 6.42)                                 | 66.2 (48.4; 77.9)                      | <0.001                            |                    | reference                |
| primary 181-240 days       | T2DM    | 30              | 2.11                                   | 12.9 (8.71; 18.42)                                | 64.0 (48.1; 75.0)                      | <0.001                            |                    | 0.84                     |
| <b>Sinopharm</b>           |         |                 |                                        |                                                   |                                        |                                   |                    |                          |

---

|                                   |                |     |        |                    |                   |        |           |
|-----------------------------------|----------------|-----|--------|--------------------|-------------------|--------|-----------|
| <b>primary 121-180 days</b>       | <b>Control</b> | 33  | 28.57  | 1.05 (0.72; 1.47)  | 58.5 (41.0; 70.8) | <0.001 | reference |
| <b>primary 121-180 days</b>       | <b>T2DM</b>    | 23  | 11.36  | 1.84 (1.17; 2.76)  | 73.7 (59.9; 82.7) | <0.001 | 0.10      |
| <b>primary 181-240 days</b>       | <b>Control</b> | 130 | 37.05  | 3.19 (2.67; 3.79)  | 47.5 (36.7; 56.4) | <0.001 | reference |
| <b>primary 181-240 days</b>       | <b>T2DM</b>    | 156 | 14.24  | 9.96 (8.46; 11.65) | 47.2 (37.3; 55.5) | <0.001 | 0.97      |
| <b>Pfizer booster 14-120 days</b> | <b>Control</b> | 42  | 118.56 | 0.32 (0.23; 0.44)  | 95.8 (94.3; 96.9) | <0.001 | reference |
| <b>Pfizer booster 14-120 days</b> | <b>T2DM</b>    | 66  | 55.83  | 1.07 (0.83; 1.37)  | 95.4 (94.1; 96.4) | <0.001 | 0.66      |

---

**Supplementary Table 3.** Incidence and adjusted effectiveness of vaccine combinations against registered *SARS-CoV-2* infection during the Delta wave in the 65-100 years old Hungarian healthy and T2DM population

| Vaccination                | Group   | Number of cases | Average population size (1000 persons) | Incidence rate (per 100 000 person-days) (95% CI) | Adjusted vaccine efficacy (%) (95% CI) | P-value comparing to unvaccinated | P-value for waning | P-value T2DM vs. Control |
|----------------------------|---------|-----------------|----------------------------------------|---------------------------------------------------|----------------------------------------|-----------------------------------|--------------------|--------------------------|
| Unvaccinated               | Control | 7 779           | 165.48                                 | 42.74 (41.79; 43.70)                              | reference                              |                                   |                    |                          |
| Unvaccinated               | T2DM    | 3 357           | 36.25                                  | 84.18 (81.36; 87.08)                              | reference                              |                                   |                    |                          |
| <b>Pfizer-BionTech</b>     |         |                 |                                        |                                                   |                                        |                                   |                    |                          |
| primary 14-120 days        | Control | 204             | 17.88                                  | 10.37 (9.00; 11.90)                               | 64.5 (59.2; 69.2)                      | <0.001                            | reference          | reference                |
| primary 14-120 days        | T2DM    | 136             | 7.38                                   | 16.75 (14.06; 19.82)                              | 71.6 (66.3; 76.1)                      | <0.001                            | reference          | 0.049                    |
| primary 121-180 days       | Control | 864             | 72.74                                  | 10.80 (10.09; 11.54)                              | 54.8 (51.3; 58.1)                      | <0.001                            | 0.003              | reference                |
| primary 121-180 days       | T2DM    | 696             | 37.97                                  | 16.66 (15.45; 17.95)                              | 60.9 (57.4; 64.1)                      | <0.001                            | 0.001              | 0.013                    |
| primary 181-240 days       | Control | 2 260           | 63.57                                  | 32.32 (31.00; 33.68)                              | 38.8 (35.5; 41.9)                      | <0.001                            | <0.001             | reference                |
| primary 181-240 days       | T2DM    | 2 002           | 35.30                                  | 51.56 (49.33; 53.87)                              | 50.1 (47.2; 52.9)                      | <0.001                            | <0.001             | <0.001                   |
| Pfizer booster 14-120 days | Control | 656             | 87.56                                  | 6.81 (6.30; 7.35)                                 | 86.9 (85.8; 88.0)                      | <0.001                            | <0.001             | reference                |
| Pfizer booster 14-120 days | T2DM    | 730             | 57.54                                  | 11.53 (10.71; 12.40)                              | 89.1 (88.1; 89.9)                      | <0.001                            | <0.001             | 0.002                    |
| <b>Moderna</b>             |         |                 |                                        |                                                   |                                        |                                   |                    |                          |
| primary 181-240 days       | Control | 219             | 10.17                                  | 19.57 (17.07; 22.35)                              | 62.1 (56.6; 66.9)                      | <0.001                            |                    | reference                |
| primary 181-240 days       | T2DM    | 174             | 5.40                                   | 29.28 (25.09; 33.97)                              | 70.8 (66.0; 74.9)                      | <0.001                            |                    | 0.012                    |
| <b>Sputnik</b>             |         |                 |                                        |                                                   |                                        |                                   |                    |                          |
| primary 181-240 days       | Control | 1 045           | 24.37                                  | 38.98 (36.65; 41.41)                              | 29.0 (23.9; 33.9)                      | <0.001                            |                    | reference                |
| primary 181-240 days       | T2DM    | 375             | 6.18                                   | 55.18 (49.74; 61.06)                              | 51.9 (46.4; 56.9)                      | <0.001                            |                    | <0.001                   |
| <b>Astra-Zeneca</b>        |         |                 |                                        |                                                   |                                        |                                   |                    |                          |
| primary 121-180 days       | Control | 743             | 25.08                                  | 26.93 (25.03; 28.94)                              | 45.0 (40.5; 49.2)                      | <0.001                            |                    | reference                |
| primary 121-180 days       | T2DM    | 558             | 11.24                                  | 45.14 (41.47; 49.04)                              | 52.6 (48.0; 56.7)                      | <0.001                            |                    | 0.016                    |
| primary 181-240 days       | Control | 200             | 4.45                                   | 40.89 (35.42; 46.97)                              | 32.6 (22.2; 41.5)                      | <0.001                            |                    | reference                |
| primary 181-240 days       | T2DM    | 152             | 1.92                                   | 71.89 (60.91; 84.27)                              | 40.7 (30.1; 49.7)                      | <0.001                            |                    | 0.25                     |
| <b>Sinopharm</b>           |         |                 |                                        |                                                   |                                        |                                   |                    |                          |

|                                   |                |       |        |                      |                   |        |           |
|-----------------------------------|----------------|-------|--------|----------------------|-------------------|--------|-----------|
| <b>primary 121-180 days</b>       | <b>Control</b> | 429   | 26.88  | 14.51 (13.17; 15.95) | 17.2 (8.3; 25.2)  | <0.001 | reference |
| <b>primary 121-180 days</b>       | <b>T2DM</b>    | 219   | 10.40  | 19.14 (16.69; 21.85) | 34.4 (24.5; 43.0) | <0.001 | 0.009     |
| <b>primary 181-240 days</b>       | <b>Control</b> | 1 713 | 35.74  | 43.58 (41.54; 45.69) | 1.4 (-4.4; 7.0)   | 0.62   | reference |
| <b>primary 181-240 days</b>       | <b>T2DM</b>    | 1 042 | 13.47  | 70.32 (66.12; 74.73) | 20.5 (14.6; 26.0) | <0.001 | <0.001    |
| <b>Pfizer booster 14-120 days</b> | <b>Control</b> | 750   | 115.57 | 5.90 (5.48; 6.34)    | 87.8 (86.8; 88.7) | <0.001 | reference |
| <b>Pfizer booster 14-120 days</b> | <b>T2DM</b>    | 671   | 53.76  | 11.35 (10.50; 12.24) | 88.3 (87.2; 89.2) | <0.001 | 0.48      |

**Supplementary Table 4.** Incidence and adjusted effectiveness of vaccine combinations against *COVID-19* related death during the Delta wave in the 45-64 years old Hungarian healthy and T2DM population

| Vaccination                | Group   | Number of cases | Average population size (1000 persons) | Incidence rate (per 100 000 person-days) (95% CI) | Adjusted vaccine efficacy (%) (95% CI) | P-value comparing to unvaccinated | P-value for waning | P-value T2DM vs. Control |
|----------------------------|---------|-----------------|----------------------------------------|---------------------------------------------------|----------------------------------------|-----------------------------------|--------------------|--------------------------|
| Unvaccinated               | Control | 935             | 655.79                                 | 1.3 (1.21; 1.38)                                  | reference                              |                                   |                    |                          |
| Unvaccinated               | T2DM    | 373             | 43.65                                  | 7.77 (7; 8.6)                                     | reference                              |                                   |                    |                          |
| <b>Pfizer-BionTech</b>     |         |                 |                                        |                                                   |                                        |                                   |                    |                          |
| primary 14-120 days        | Control | 9               | 93.84                                  | 0.09 (0.04; 0.17)                                 | 88.4 (77.6; 94.0)                      | <0.001                            | reference          | reference                |
| primary 14-120 days        | T2DM    | 7               | 10.85                                  | 0.59 (0.24; 1.21)                                 | 88.7 (76.0; 94.7)                      | <0.001                            | reference          | 0.96                     |
| primary 121-180 days       | Control | 17              | 193.84                                 | 0.08 (0.05; 0.13)                                 | 92.1 (87.3; 95.1)                      | <0.001                            | 0.35               | reference                |
| primary 121-180 days       | T2DM    | 23              | 25.75                                  | 0.81 (0.51; 1.22)                                 | 86.7 (79.6; 91.3)                      | <0.001                            | 0.71               | 0.11                     |
| primary 181-240 days       | Control | 24              | 99.01                                  | 0.22 (0.14; 0.33)                                 | 88.3 (82.4; 92.2)                      | <0.001                            | 0.98               | reference                |
| primary 181-240 days       | T2DM    | 43              | 14.37                                  | 2.72 (1.97; 3.66)                                 | 77.0 (68.3; 83.3)                      | <0.001                            | 0.090              | 0.011                    |
| Pfizer booster 14-120 days | Control | 7               | 88.16                                  | 0.07 (0.03; 0.15)                                 | 96.6 (92.8; 98.4)                      | <0.001                            | 0.016              | reference                |
| Pfizer booster 14-120 days | T2DM    | 8               | 16.76                                  | 0.43 (0.19; 0.85)                                 | 96.4 (92.8; 98.2)                      | <0.001                            | 0.029              | 0.91                     |
| <b>Moderna</b>             |         |                 |                                        |                                                   |                                        |                                   |                    |                          |
| primary 181-240 days       | Control | 4               | 19.57                                  | 0.19 (0.05; 0.48)                                 | 91.2 (76.6; 96.7)                      | <0.001                            |                    | reference                |
| primary 181-240 days       | T2DM    | 9               | 2.73                                   | 2.99 (1.37; 5.68)                                 | 75.7 (52.8; 87.5)                      | <0.001                            |                    | 0.093                    |
| <b>Sputnik</b>             |         |                 |                                        |                                                   |                                        |                                   |                    |                          |
| primary 181-240 days       | Control | 36              | 110.71                                 | 0.30 (0.21; 0.41)                                 | 85.0 (79.0; 89.2)                      | <0.001                            |                    | reference                |
| primary 181-240 days       | T2DM    | 18              | 8.09                                   | 2.02 (1.20; 3.20)                                 | 81.8 (70.6; 88.7)                      | <0.001                            |                    | 0.52                     |
| <b>Astra-Zeneca</b>        |         |                 |                                        |                                                   |                                        |                                   |                    |                          |
| primary 121-180 days       | Control | 17              | 75.04                                  | 0.21 (0.12; 0.33)                                 | 86.6 (78.3; 91.7)                      | <0.001                            |                    | reference                |
| primary 121-180 days       | T2DM    | 18              | 14.90                                  | 1.10 (0.65; 1.74)                                 | 85.3 (76.4; 90.9)                      | <0.001                            |                    | 0.79                     |
| primary 181-240 days       | Control | 13              | 21.61                                  | 0.55 (0.29; 0.94)                                 | 64.9 (39.3; 79.7)                      | <0.001                            |                    | reference                |
| primary 181-240 days       | T2DM    | 19              | 9.11                                   | 1.90 (1.14; 2.96)                                 | 70.5 (53.1; 81.4)                      | <0.001                            |                    | 0.63                     |
| <b>Sinopharm</b>           |         |                 |                                        |                                                   |                                        |                                   |                    |                          |

|                                   |                |    |       |                   |                   |        |           |
|-----------------------------------|----------------|----|-------|-------------------|-------------------|--------|-----------|
| <b>primary 121-180 days</b>       | <b>Control</b> | 19 | 64.90 | 0.27 (0.16; 0.42) | 73.0 (57.4; 82.9) | <0.001 | reference |
| <b>primary 121-180 days</b>       | <b>T2DM</b>    | 19 | 6.68  | 2.58 (1.56; 4.04) | 51.7 (22.8; 69.8) | <0.001 | 0.082     |
| <b>primary 181-240 days</b>       | <b>Control</b> | 33 | 36.73 | 0.82 (0.56; 1.15) | 60.2 (43.7; 71.9) | <0.001 | reference |
| <b>primary 181-240 days</b>       | <b>T2DM</b>    | 23 | 5.29  | 3.95 (2.51; 5.93) | 60.0 (38.8; 73.8) | <0.001 | 0.99      |
| <b>Pfizer booster 14-120 days</b> | <b>Control</b> | 5  | 51.15 | 0.09 (0.03; 0.21) | 96.3 (91.0; 98.4) | <0.001 | reference |
| <b>Pfizer booster 14-120 days</b> | <b>T2DM</b>    | 6  | 12.50 | 0.44 (0.16; 0.95) | 96.1 (91.1; 98.2) | <0.001 | 0.93      |



**Supplementary Table 5.** Incidence and adjusted effectiveness of vaccine combinations against registered *SARS-CoV-2* infection during the Delta wave in the 45-64 years old Hungarian healthy and T2DM population

| Vaccination                | Group   | Number of cases | Average population size (1000 persons) | Incidence rate (per 100 000 person-days) (95% CI) | Adjusted vaccine efficacy (%) (95% CI) | P-value comparing to unvaccinated | P-value for waning | P-value T2DM vs. Control |
|----------------------------|---------|-----------------|----------------------------------------|---------------------------------------------------|----------------------------------------|-----------------------------------|--------------------|--------------------------|
| Unvaccinated               | Control | 40 050          | 590.55                                 | 61.65 (61.05; 62.26)                              | reference                              |                                   |                    |                          |
| Unvaccinated               | T2DM    | 4 142           | 36.61                                  | 102.84 (99.74; 106.02)                            | reference                              |                                   |                    |                          |
| <b>Pfizer-BionTech</b>     |         |                 |                                        |                                                   |                                        |                                   |                    |                          |
| primary 14-120 days        | Control | 760             | 69.53                                  | 9.94 (9.24; 10.67)                                | 71.2 (69.0; 73.2)                      | <0.001                            | reference          | reference                |
| primary 14-120 days        | T2DM    | 123             | 7.64                                   | 14.64 (12.17; 17.47)                              | 75.7 (70.9; 79.7)                      | <0.001                            | reference          | 0.086                    |
| primary 121-180 days       | Control | 5 692           | 165.13                                 | 31.34 (30.53; 32.16)                              | 46.8 (45.0; 48.5)                      | <0.001                            | <0.001             | reference                |
| primary 121-180 days       | T2DM    | 782             | 22.07                                  | 32.22 (30.00; 34.55)                              | 59.9 (56.6; 63.0)                      | <0.001                            | <0.001             | <0.001                   |
| primary 181-240 days       | Control | 6 558           | 84.83                                  | 70.28 (68.59; 72.00)                              | 17.7 (15.0; 20.4)                      | <0.001                            | <0.001             | reference                |
| primary 181-240 days       | T2DM    | 1 061           | 12.51                                  | 77.12 (72.55; 81.90)                              | 45.9 (41.8; 49.7)                      | <0.001                            | <0.001             | <0.001                   |
| Pfizer booster 14-120 days | Control | 1 053           | 77.34                                  | 12.38 (11.64; 13.15)                              | 82.8 (81.6; 83.8)                      | <0.001                            | <0.001             | reference                |
| Pfizer booster 14-120 days | T2DM    | 188             | 14.81                                  | 11.54 (9.95; 13.31)                               | 90.4 (88.9; 91.7)                      | <0.001                            | <0.001             | <0.001                   |
| <b>Moderna</b>             |         |                 |                                        |                                                   |                                        |                                   |                    |                          |
| primary 181-240 days       | Control | 927             | 17.48                                  | 48.20 (45.15; 51.41)                              | 48.6 (44.9; 51.9)                      | <0.001                            |                    | reference                |
| primary 181-240 days       | T2DM    | 159             | 2.43                                   | 59.40 (50.52; 69.38)                              | 61.1 (54.3; 66.8)                      | <0.001                            |                    | 0.002                    |
| <b>Sputnik</b>             |         |                 |                                        |                                                   |                                        |                                   |                    |                          |
| primary 181-240 days       | Control | 9 936           | 101.91                                 | 88.63 (86.90; 90.39)                              | 7.9 (5.2; 10.5)                        | <0.001                            |                    | reference                |
| primary 181-240 days       | T2DM    | 729             | 7.42                                   | 89.25 (82.89; 95.97)                              | 40.8 (35.7; 45.5)                      | <0.001                            |                    | <0.001                   |
| <b>Astra-Zeneca</b>        |         |                 |                                        |                                                   |                                        |                                   |                    |                          |
| primary 121-180 days       | Control | 4 580           | 69.20                                  | 60.17 (58.44; 61.94)                              | 26.0 (23.3; 28.6)                      | <0.001                            |                    | reference                |
| primary 121-180 days       | T2DM    | 912             | 13.35                                  | 62.10 (58.13; 66.26)                              | 48.0 (43.8; 51.8)                      | <0.001                            |                    | <0.001                   |
| primary 181-240 days       | Control | 1 490           | 19.46                                  | 69.62 (66.13; 73.25)                              | -14.1 (-20.5; -8.1)                    | <0.001                            |                    | reference                |
| primary 181-240 days       | T2DM    | 596             | 8.25                                   | 65.68 (60.51; 71.17)                              | 26.8 (20.0; 33.0)                      | <0.001                            |                    | <0.001                   |
| <b>Sinopharm</b>           |         |                 |                                        |                                                   |                                        |                                   |                    |                          |

|                                   |                |       |       |                       |                     |        |           |
|-----------------------------------|----------------|-------|-------|-----------------------|---------------------|--------|-----------|
| <b>primary 121-180 days</b>       | <b>Control</b> | 3 610 | 59.24 | 55.40 (53.60; 57.23)  | 7.8 (4.1; 11.3)     | <0.001 | reference |
| <b>primary 121-180 days</b>       | <b>T2DM</b>    | 346   | 5.899 | 53.32 (47.85; 59.25)  | 30.1 (21.8; 37.6)   | <0.001 | <0.001    |
| <b>primary 181-240 days</b>       | <b>Control</b> | 2 924 | 33.34 | 79.73 (76.87; 82.68)  | -10.4 (-15.2; -5.9) | <0.001 | reference |
| <b>primary 181-240 days</b>       | <b>T2DM</b>    | 488   | 4.79  | 92.68 (84.64; 101.28) | 20.5 (12.3; 27.8)   | <0.001 | <0.001    |
| <b>Pfizer booster 14-120 days</b> | <b>Control</b> | 396   | 48.22 | 7.47 (6.75; 8.24)     | 88.3 (87.1; 89.5)   | <0.001 | reference |
| <b>Pfizer booster 14-120 days</b> | <b>T2DM</b>    | 148   | 11.72 | 11.48 (9.71; 13.49)   | 89.5 (87.6; 91.1)   | <0.001 | 0.28      |
